# Supplementary material for: Enzymatic Synthesis of Unnatural Ginsenosides Using a Promiscuous UDP-Glucosyltransferase from Bacillus subtilis
Source: PubMed Central journal article supplement (PMC6278262; doi:10.3390/molecules23112797), 2018-10-28

## Supplementary Information

**Table S1**  $^1\text{H}$ -NMR (600 MHz) and  $^{13}\text{C}$ -NMR (150 MHz) spectral data for product **1** in pyridine- $d_5$ .

| C                      | $\delta_{\text{C}}$ | $\delta_{\text{H}}$ (mult, $J$ in Hz)     |
|------------------------|---------------------|-------------------------------------------|
| 1                      | 39.7                | 0.97 (1H, m); 1.54 (1H, m)                |
| 2                      | 27.2                | 2.01 (1H, m); 2.03 (1H, m)                |
| 3                      | 89.6                | 3.38 (1H, dd, $J = 13.2, 4.8$ Hz)         |
| 4                      | 40.7                |                                           |
| 5                      | 61.5                | 1.32 (1H, s)                              |
| 6                      | 74.8                | 4.37 (1H, m)                              |
| 7                      | 45.9                | 2.23 (1H, m); 2.37 (1H, m)                |
| 8                      | 41.7                |                                           |
| 9                      | 50.1                | 1.46 (1H, m)                              |
| 10                     | 39.5                |                                           |
| 11                     | 31.5                | 1.46 (1H, m); 2.24 (1H, m)                |
| 12                     | 70.7                | 4.16 (1H, m)                              |
| 13                     | 49.7                | 2.16 (1H, s)                              |
| 14                     | 52.0                |                                           |
| 15                     | 31.3                | 0.76 (1H, m); 1.33 (1H, d, $J = 10.8$ Hz) |
| 16                     | 27.0                | 1.27 (1H, m); 1.94 (1H, m)                |
| 17                     | 52.2                | 2.54 (1H, m)                              |
| 18                     | 17.9                | 1.13 (3H, s)                              |
| 19                     | 18.0                | 1.00 (3H, s)                              |
| 20                     | 83.8                |                                           |
| 21                     | 22.9                | 1.59 (3H, s)                              |
| 22                     | 36.6                | 1.56 (1H, m); 2.53 (1H, m)                |
| 23                     | 23.8                | 2.24 (1H, m); 2.54 (1H, m)                |
| 24                     | 126.4               | 5.24 (1H, m)                              |
| 25                     | 131.6               |                                           |
| 26                     | 26.3                | 1.61 (3H, s)                              |
| 27                     | 18.5                | 1.61 (3H, s)                              |
| 28                     | 32.1                | 2.12 (3H, s)                              |
| 29                     | 18.3                | 1.40 (3H, s)                              |
| 30                     | 17.8                | 0.91 (3H, s)                              |
| 6- <i>O</i> -Glc-1'    | 102.4               | 5.19 (1H, d, $J = 7.2$ Hz)                |
| 2'                     | 78.9                | 4.16 (1H, m)                              |
| 3'                     | 79.9                | 4.22 (1H, m)                              |
| 4'                     | 73.0                | 4.08 (1H, m)                              |
| 5'                     | 78.9                | 3.94 (1H, m)                              |
| 6'                     | 63.7                | 4.32 (1H, m); 4.49 (1H, m)                |
| 2'- <i>O</i> -Rham-1'' | 102.3               | 6.49 (1H, s)                              |

---

|                        |       |                                  |
|------------------------|-------|----------------------------------|
| 2''                    | 72.8  | 4.70 (1H, dd, $J = 9.6, 3.6$ Hz) |
| 3''                    | 72.5  | 4.61 (1H, m)                     |
| 4''                    | 75.7  | 4.34 (1H, m)                     |
| 5''                    | 70.2  | 4.80 (1H, m)                     |
| 6''                    | 19.4  | 1.80 (3H, d, $J = 6.0$ Hz)       |
| 20- <i>O</i> -Glc-1''' | 98.8  | 5.18 (1H, d, $J = 7.2$ Hz)       |
| 2'''                   | 75.7  | 4.01 (1H, m)                     |
| 3'''                   | 79.4  | 4.20 (1H, m)                     |
| 4'''                   | 72.2  | 4.07 (1H, m)                     |
| 5'''                   | 78.8  | 3.92 (1H, m)                     |
| 6'''                   | 63.5  | 4.24 (1H, m); 4.59 (1H, m)       |
| 3- <i>O</i> -Glc-1'''' | 107.6 | 4.97 (overlapped)                |
| 2''''                  | 76.5  | 4.70 (1H, m)                     |
| 3''''                  | 79.8  | 4.23 (1H, m)                     |
| 4''''                  | 73.0  | 4.15 (1H, m)                     |
| 5''''                  | 79.1  | 3.95 (1H, m)                     |
| 6''''                  | 64.4  | 4.35 (1H, m); 4.59 (1H, m)       |

---

**Table S2**  $^1\text{H}$ -NMR (500 MHz) and  $^{13}\text{C}$ -NMR (125 MHz) spectral data for product **2** in pyridine- $d_5$ .

| C                     | $\delta_{\text{C}}$ | $\delta_{\text{H}}$ (mult, $J$ in Hz)           |
|-----------------------|---------------------|-------------------------------------------------|
| 1                     | 39.3                | 0.58 (1H, m); 1.53 (1H, m)                      |
| 2                     | 27.5                | 1.78 (1H, m); 1.84 (1H, m)                      |
| 3                     | 90.2                | 3.39 (1H, dd, $J = 11.5, 4.0$ Hz)               |
| 4                     | 40.7                |                                                 |
| 5                     | 61.9                | 1.23 (1H, m)                                    |
| 6                     | 80.7                | 4.25 (1H, m)                                    |
| 7                     | 44.5                | 1.95 (1H, td, $J = 13.5, 3.0$ Hz); 2.33 (1H, m) |
| 8                     | 41.1                |                                                 |
| 9                     | 50.0                | 1.26 (1H, m)                                    |
| 10                    | 40.8                |                                                 |
| 11                    | 31.7                | 1.28 (1H, m); 2.25 (1H, m)                      |
| 12                    | 79.1                | 3.81 (1H, m)                                    |
| 13                    | 46.7                | 2.02 (1H, m)                                    |
| 14                    | 52.5                |                                                 |
| 15                    | 28.0                | 1.16 (1H, t, $J = 10.0$ Hz); 1.29 (1H, m)       |
| 16                    | 27.2                | 1.21 (1H, m); 1.73 (1H, m)                      |
| 17                    | 54.4                | 2.31 (1H, m)                                    |
| 18                    | 17.6                | 0.85 (3H, s)                                    |
| 19                    | 17.8                | 0.75 (3H, s)                                    |
| 20                    | 73.3                |                                                 |
| 21                    | 26.7                | 1.31 (3H, s)                                    |
| 22                    | 36.8                | 1.62 (1H, m); 2.23 (1H, m)                      |
| 23                    | 23.3                | 1.29 (1H, m); 2.29 (1H, m)                      |
| 24                    | 126.9               | 5.35 (1H, t, $J = 7.0$ Hz)                      |
| 25                    | 131.0               |                                                 |
| 26                    | 26.2                | 1.65 (3H, s)                                    |
| 27                    | 18.1                | 1.64 (3H, s)                                    |
| 28                    | 31.5                | 2.16 (3H, s)                                    |
| 29                    | 17.3                | 1.55 (3H, s)                                    |
| 30                    | 17.2                | 0.65 (3H, s)                                    |
| 6- <i>O</i> -Glc-1'   | 104.5               | 5.88 (1H, d, $J = 7.5$ Hz)                      |
| 2'                    | 80.1                | 4.37 (1H, m)                                    |
| 3'                    | 80.4                | 4.23 (1H, m)                                    |
| 4'                    | 72.0                | 4.13 (1H, m)                                    |
| 5'                    | 78.8                | 3.92 (1H, m)                                    |
| 6'                    | 63.0                | 4.30 (1H, m); 4.53 (1H, m)                      |
| 2'- <i>O</i> -Glc-1'' | 103.8               | 4.78 (1H, d, $J = 7.5$ Hz)                      |
| 2''                   | 76.3                | 4.49 (1H, m)                                    |
| 3''                   | 78.9                | 4.29 (1H, m)                                    |

---

|                |       |                             |
|----------------|-------|-----------------------------|
| 4''            | 72.1  | 4.21 (1H, m)                |
| 5''            | 78.6  | 4.12 (1H, m)                |
| 6''            | 63.1  | 4.37 (1H, m) ; 4.38 (1H, m) |
| 3-O-Glc-1'''   | 107.8 | 5.03 (1H, d, $J = 7.5$ Hz)  |
| 2'''           | 76.4  | 4.47 (1H, m)                |
| 3'''           | 78.9  | 4.25 (1H, m)                |
| 4'''           | 71.7  | 4.17 (1H, m)                |
| 5'''           | 78.3  | 4.05 (1H, m)                |
| 6'''           | 63.1  | 4.37 (1H, m); 4.55 (1H, m)  |
| 12-O-Glc-1'''' | 100.6 | 5.28 (1H, d, $J = 7.5$ Hz)  |
| 2''''          | 75.7  | 4.48 (1H, m)                |
| 3''''          | 78.8  | 4.27 (1H, m)                |
| 4''''          | 71.7  | 4.18 (1H, m)                |
| 5''''          | 77.6  | 4.11 (1H, m)                |
| 6''''          | 63.5  | 4.37 (1H, m); 4.66 (1H, m)  |

---

**Table S3**  $^1\text{H}$ -NMR (600 MHz) and  $^{13}\text{C}$ -NMR (150 MHz) spectral data for product **3** in pyridine-*d*<sub>5</sub>.

| C                     | $\delta_{\text{C}}$ | $\delta_{\text{H}}$ (mult, $J$ in Hz)                             |
|-----------------------|---------------------|-------------------------------------------------------------------|
| 1                     | 39.4                | 0.81(1H, m); 1.71 (1H, m)                                         |
| 2                     | 27.4                | 2.01 (1H, m); 2.03 (1H, m)                                        |
| 3                     | 90.3                | 3.43 (1H, dd, $J = 12.0, 4.2$ Hz)                                 |
| 4                     | 40.8                |                                                                   |
| 5                     | 62.0                | 1.37 (1H, m)                                                      |
| 6                     | 80.3                | 4.26 (1H, m)                                                      |
| 7                     | 44.9                | 1.96 (1H, t, $J = 12.0$ Hz);<br>2.35 (1H, dd, $J = 12.0, 3.6$ Hz) |
| 8                     | 41.4                |                                                                   |
| 9                     | 50.4                | 1.50 (1H, m)                                                      |
| 10                    | 39.4                |                                                                   |
| 11                    | 31.8                | 1.47 (1H, m); 2.31 (1H, m)                                        |
| 12                    | 71.4                | 3.84 (1H, m)                                                      |
| 13                    | 48.7                | 2.05 (1H, m)                                                      |
| 14                    | 52.1                |                                                                   |
| 15                    | 31.6                | 1.24 (1H, t, $J = 10.2$ Hz); 1.53 (1H, m)                         |
| 16                    | 26.8                | 1.35 (1H, m); 1.88 (1H, m)                                        |
| 17                    | 55.2                | 2.38 (1H, m)                                                      |
| 18                    | 17.8                | 1.11 (3H, s)                                                      |
| 19                    | 17.9                | 0.90 (3H, s)                                                      |
| 20                    | 73.4                |                                                                   |
| 21                    | 27.2                | 1.42 (3H, s)                                                      |
| 22                    | 36.2                | 1.85 (1H, m); 2.33 (1H, m)                                        |
| 23                    | 23.4                | 2.33 (1H, m); 2.62 (1H, m)                                        |
| 24                    | 126.7               | 5.34 (1H, t, $J = 6.6$ Hz)                                        |
| 25                    | 131.2               |                                                                   |
| 26                    | 26.2                | 1.67 (3H, s)                                                      |
| 27                    | 18.1                | 1.64 (3H, s)                                                      |
| 28                    | 32.4                | 2.16 (3H, s)                                                      |
| 29                    | 17.4                | 1.56 (3H, s)                                                      |
| 30                    | 17.2                | 0.85 (3H, s)                                                      |
| 6- <i>O</i> -Glc-1'   | 104.0               | 5.86 (1H, d, $J = 7.8$ Hz)                                        |
| 2'                    | 80.3                | 4.38 (1H, m)                                                      |
| 3'                    | 80.9                | 4.29 (1H, m)                                                      |
| 4'                    | 71.8                | 4.07 (1H, m)                                                      |
| 5'                    | 78.7                | 3.91 (1H, m)                                                      |
| 6'                    | 63.2                | 4.23 (1H, m); 4.51 (1H, m)                                        |
| 2'- <i>O</i> -Glc-1'' | 104.5               | 4.84 (1H, d, $J = 7.2$ Hz)                                        |
| 2''                   | 76.4                | 4.49 (1H, m)                                                      |
| 3''                   | 78.8                | 4.38 (1H, m)                                                      |

---

|                       |       |                             |
|-----------------------|-------|-----------------------------|
| 4''                   | 72.1  | 4.17 (1H, m)                |
| 5''                   | 78.3  | 4.01 (1H, m)                |
| 6''                   | 63.2  | 4.28 (1H, m) ; 4.60 (1H, m) |
| 3- <i>O</i> -Glc-1''' | 107.7 | 5.02 (1H, d, $J = 7.8$ Hz)  |
| 2'''                  | 76.4  | 4.43 (1H, m)                |
| 3'''                  | 78.9  | 4.30 (1H, m)                |
| 4'''                  | 72.2  | 4.14 (1H, m)                |
| 5'''                  | 78.6  | 3.92 (1H, m)                |
| 6'''                  | 63.5  | 4.24 (1H, m); 4.51 (1H, m)  |

---

**Table S4**  $^1\text{H}$ -NMR (500 MHz) and  $^{13}\text{C}$ -NMR (125 MHz) spectral data for product **4** in methanol- $d_4$ .

| C                    | $\delta_{\text{C}}$ | $\delta_{\text{H}}$ (mult, $J$ in Hz)           |
|----------------------|---------------------|-------------------------------------------------|
| 1                    | 39.9                | 1.14 (1H, s); 1.70 (1H, m)                      |
| 2                    | 27.7                | 1.88 (1H, m); 1.97 (1H, m)                      |
| 3                    | 90.9                | 3.22 (1H, m)                                    |
| 4                    | 40.9                |                                                 |
| 5                    | 62.0                | 1.30 (1H, m)                                    |
| 6                    | 80.8                | 4.06 (1H, td, $J = 10.5, 3.0$ Hz)               |
| 7                    | 45.2                | 1.90 (1H, m); 3.06 (1H, m)                      |
| 8                    | 41.8                |                                                 |
| 9                    | 50.7                | 1.41 (1H, m)                                    |
| 10                   | 40.2                |                                                 |
| 11                   | 31.7                | 1.41 (1H, m); 2.05 (1H, m)                      |
| 12                   | 79.4                | 3.23 (1H, m)                                    |
| 13                   | 46.9                | 1.80 (1H, m)                                    |
| 14                   | 53.1                |                                                 |
| 15                   | 28.6                | 1.13 (1H, m); 1.54 (1H, m)                      |
| 16                   | 26.8                | 1.26 (1H, m); 1.76 (1H, m)                      |
| 17                   | 55.1                | 2.09 (1H, m)                                    |
| 18                   | 17.6                | 1.04 (3H, s)                                    |
| 19                   | 17.9                | 0.97 (3H, s)                                    |
| 20                   | 74.8                |                                                 |
| 21                   | 26.1                | 1.08 (3H, s)                                    |
| 22                   | 36.7                | 1.58 (1H, m); 1.80 (1H, m)                      |
| 23                   | 23.3                | 2.07 (1H, m); 3.08 (1H, m)                      |
| 24                   | 126.3               | 5.11 (1H, t, $J = 7.0$ Hz)                      |
| 25                   | 131.9               |                                                 |
| 26                   | 25.9                | 1.60 (3H, s)                                    |
| 27                   | 17.8                | 1.36 (3H, s)                                    |
| 28                   | 31.1                | 1.65 (3H, s)                                    |
| 29                   | 16.8                | 1.09 (3H, s)                                    |
| 30                   | 17.3                | 0.93 (3H, s)                                    |
| 6- <i>O</i> -Glc-1'  | 105.6               | 4.31 (1H, d, $J = 8.0$ Hz)                      |
| 2'                   | 75.7                | 3.17 (1H, td, $J = 8.5, 2.5$ Hz)                |
| 3'                   | 79.0                | 3.58 (1H, m)                                    |
| 4'                   | 71.7                | 3.30 (1H, m)                                    |
| 5'                   | 78.0                | 3.11 (1H, m)                                    |
| 6'                   | 62.9                | 3.77 (1H, s); 3.87 (1H, td, $J = 10.5, 5.0$ Hz) |
| 3- <i>O</i> -Glc-1'' | 107.0               | 4.29 (1H, d, $J = 8.0$ Hz)                      |
| 2''                  | 75.5                | 3.17 (1H, td, $J = 8.5, 2.5$ Hz)                |
| 3''                  | 78.4                | 3.30 (1H, m)                                    |
| 4''                  | 71.7                | 3.24 (1H, m)                                    |

---

|                |       |                                  |
|----------------|-------|----------------------------------|
| 5''            | 77.7  | 3.06 (1H, m)                     |
| 6''            | 62.8  | 3.63 (1H, m); 3.79 (1H, m)       |
| 12-O-Glc-1'''' | 100.6 | 4.47 (1H, d, $J = 8.0$ Hz)       |
| 2''            | 75.1  | 3.17 (1H, td, $J = 8.5, 2.5$ Hz) |
| 3''            | 78.3  | 3.33 (1H, m)                     |
| 4''            | 71.0  | 3.25 (1H, m)                     |
| 5''            | 77.6  | 3.08 (1H, m)                     |
| 6''            | 62.4  | 3.64 (1H, m); 3.82 (1H, m)       |

---



**Table S5** <sup>1</sup>H-NMR (500 MHz) and <sup>13</sup>C-NMR (125 MHz) spectral data for product **5** in methanol-*d*<sub>4</sub>.

| C                    | $\delta_C$ | $\delta_H$ (mult, <i>J</i> in Hz)                    |
|----------------------|------------|------------------------------------------------------|
| 1                    | 40.1       | 1.41 (1H, s); 1.71 (1H, m)                           |
| 2                    | 27.4       | 1.75 (1H, m); 1.87 (1H, m)                           |
| 3                    | 90.9       | 3.27 (1H, m)                                         |
| 4                    | 40.9       |                                                      |
| 5                    | 62.0       | 1.14 (1H, m)                                         |
| 6                    | 80.8       | 4.09 (1H, td, <i>J</i> = 10.5, 2.5 Hz)               |
| 7                    | 45.4       | 1.85 (1H, m); 3.12 (1H, dd, <i>J</i> = 12.0, 4.5 Hz) |
| 8                    | 41.8       |                                                      |
| 9                    | 50.9       | 1.53 (1H, m)                                         |
| 10                   | 40.0       |                                                      |
| 11                   | 32.0       | 1.50 (1H, s); 2.02 (1H, m)                           |
| 12                   | 71.7       | 3.89 (1H, m)                                         |
| 13                   | 49.6       | 1.97 (1H, m)                                         |
| 14                   | 52.5       |                                                      |
| 15                   | 31.2       | 1.22 (1H, m); 1.55 (1H, s)                           |
| 16                   | 26.8       | 1.29 (1H, m); 1.73 (1H, m)                           |
| 17                   | 55.1       | 2.15 (1H, m)                                         |
| 18                   | 17.6       | 1.07 (3H, s)                                         |
| 19                   | 17.7       | 1.00 (3H, s)                                         |
| 20                   | 74.4       |                                                      |
| 21                   | 26.5       | 1.09 (3H, s)                                         |
| 22                   | 36.3       | 1.64 (1H, m); 2.00 (1H, m)                           |
| 23                   | 23.3       | 2.05 (1H, m); 3.26 (1H, m)                           |
| 24                   | 126.2      | 5.14 (1H, t, <i>J</i> = 7.0 Hz)                      |
| 25                   | 132.0      |                                                      |
| 26                   | 25.9       | 1.62 (3H, s)                                         |
| 27                   | 17.9       | 1.40 (3H, s)                                         |
| 28                   | 31.9       | 1.68 (3H, s)                                         |
| 29                   | 16.8       | 1.15 (3H, s)                                         |
| 30                   | 17.0       | 0.94 (3H, s)                                         |
| 6- <i>O</i> -Glc-1'  | 105.6      | 4.34 (1H, d, <i>J</i> = 7.5 Hz)                      |
| 2'                   | 75.8       | 3.65 (1H, td, <i>J</i> = 11.5, 5.5 Hz)               |
| 3'                   | 79.1       | 3.35 (1H, m)                                         |
| 4'                   | 72.1       | 3.34 (1H, m)                                         |
| 5'                   | 77.7       | 3.20 (1H, td, <i>J</i> = 7.5, 2.0 Hz)                |
| 6'                   | 62.9       | 3.83 (1H, t, <i>J</i> = 12.0 Hz); 4.63 (1H, s)       |
| 3- <i>O</i> -Glc-1'' | 107.0      | 4.32 (1H, d, <i>J</i> = 7.5 Hz)                      |
| 2''                  | 75.3       | 3.64 (1H, td, <i>J</i> = 11.5, 5.5 Hz)               |
| 3''                  | 78.4       | 3.55 (1H, m)                                         |
| 4''                  | 71.7       | 3.33 (1H, m)                                         |

---

|    |      |                                                                |
|----|------|----------------------------------------------------------------|
| 5" | 77.7 | 3.20 (1H, td, $J = 7.5, 2.0$ Hz)                               |
| 6" | 62.8 | 3.83 (1H, t, $J = 12.0$ Hz); 4.10 (1H, td, $J = 10.5, 2.5$ Hz) |

---

**Table S6**  $^1\text{H}$ -NMR (600 MHz) and  $^{13}\text{C}$ -NMR (150 MHz) spectral data for product **6** in pyridine-*d*<sub>5</sub>.

| C                      | $\delta_{\text{C}}$ | $\delta_{\text{H}}$ (mult, $J$ in Hz)     |
|------------------------|---------------------|-------------------------------------------|
| 1                      | 41.0                | 0.97 (1H, m); 1.77 (1H, m)                |
| 2                      | 27.2                | 1.94 (1H, m); 1.96 (1H, m)                |
| 3                      | 90.1                | 3.45 (1H, dd, $J = 11.4, 4.2$ Hz)         |
| 4                      | 41.6                |                                           |
| 5                      | 63.5                | 1.29 (1H, s)                              |
| 6                      | 75.7                | 4.49 (1H, t, $J = 13.2$ Hz)               |
| 7                      | 49.8                | 2.03 (1H, m); 2.34 (1H, m)                |
| 8                      | 45.3                |                                           |
| 9                      | 52.0                | 1.44 (1H, m)                              |
| 10                     | 39.7                |                                           |
| 11                     | 31.5                | 1.44 (1H, m); 2.20 (1H, m)                |
| 12                     | 70.7                | 4.00 (1H, m)                              |
| 13                     | 50.4                | 2.00 (1H, m)                              |
| 14                     | 52.0                |                                           |
| 15                     | 31.2                | 0.81 (1H, m); 1.35 (1H, d, $J = 10.2$ Hz) |
| 16                     | 26.9                | 1.28 (1H, m); 1.90 (1H, m)                |
| 17                     | 61.9                | 2.53 (1H, m)                              |
| 18                     | 17.8                | 1.10 (3H, s)                              |
| 19                     | 18.0                | 0.91 (3H, s)                              |
| 20                     | 83.8                |                                           |
| 21                     | 22.9                | 1.60 (3H, m)                              |
| 22                     | 36.7                | 1.80 (1H, m); 2.39 (1H, m)                |
| 23                     | 23.8                | 2.25 (1H, m); 2.50 (1H, m)                |
| 24                     | 126.5               | 5.25 (1H, t, $J = 7.2$ Hz)                |
| 25                     | 131.5               |                                           |
| 26                     | 26.3                | 1.60 (3H, m)                              |
| 27                     | 18.3                | 1.61 (3H, m)                              |
| 28                     | 31.7                | 2.15 (3H, s)                              |
| 29                     | 18.1                | 1.48 (3H, s)                              |
| 30                     | 17.8                | 0.84 (3H, s)                              |
| 6- <i>O</i> -Glc-1'    | 103.9               | 4.91 (1H, d, $J = 7.8$ Hz)                |
| 2'                     | 79.3                | 4.18 (1H, m)                              |
| 3'                     | 80.4                | 4.15 (1H, m)                              |
| 4'                     | 72.1                | 4.13 (1H, m)                              |
| 5'                     | 78.9                | 3.95 (1H, m)                              |
| 6'                     | 64.4                | 4.24 (1H, m); 4.35 (1H, m)                |
| 2'- <i>O</i> -Rham-1'' | 105.8               | 5.67 (1H, m)                              |
| 2''                    | 72.5                | 4.49 (1H, t, $J = 13.2$ Hz)               |
| 3''                    | 71.7                | 4.42 (1H, m)                              |
| 4''                    | 74.6                | 4.31 (1H, m)                              |

---

|               |       |                             |
|---------------|-------|-----------------------------|
| 5''           | 66.0  | 4.60 (1H, m)                |
| 20-O-Glc-1''' | 98.8  | 5.19 (1H, d, $J = 7.8$ Hz)  |
| 2'''          | 76.4  | 3.84 (1H, m)                |
| 3'''          | 79.9  | 4.15 (1H, m)                |
| 4'''          | 67.9  | 4.07 (1H, m)                |
| 5'''          | 78.8  | 3.65 (1H, t, $J = 11.4$ Hz) |
| 6'''          | 63.7  | 4.23 (1H, m); 4.34 (1H, m)  |
| 3-O-Glc-1'''' | 107.6 | 5.02 (1H, d, $J = 7.8$ Hz)  |
| 2''''         | 78.7  | 4.22 (1H, m)                |
| 3''''         | 81.7  | 4.16 (1H, m)                |
| 4''''         | 72.3  | 4.14 (1H, m)                |
| 5''''         | 79.4  | 3.01 (1H, m)                |
| 6''''         | 65.4  | 4.25 (1H, m); 4.40 (1H, m)  |

---

**Table S7** The HPLC conditions of scale-up preparation for products **1-6**.

| products       | conditions                                                            | $t_R$ (min)                              |
|----------------|-----------------------------------------------------------------------|------------------------------------------|
| <b>1</b>       | 0 min, 20% ACN; 20 min, 35% ACN; 31 min, 100% ACN;<br>40min, 100% ACN | 7.87 ( <b>1</b> )                        |
| <b>2 and 3</b> | 0 min, 20% ACN; 30 min, 40% ACN; 31 min, 100% ACN;<br>40min, 100% ACN | 7.28 ( <b>2</b> );<br>12.88 ( <b>3</b> ) |
| <b>4 and 5</b> | 0 min, 20% ACN; 20 min, 40% ACN; 31 min, 100% ACN;<br>40min, 100% ACN | 8.21 ( <b>4</b> );<br>14.19 ( <b>5</b> ) |
| <b>6</b>       | 0 min, 20% ACN; 30 min, 35% ACN; 31 min, 100% ACN;<br>40min, 100% ACN | 7.01 ( <b>6</b> )                        |

**Figure S1.** The  $^1\text{H}$  NMR (A),  $^{13}\text{C}$  NMR (B), HMBC (C) and HSQC (D) spectra of product **1** in pyridine- $d_5$ .

**A**

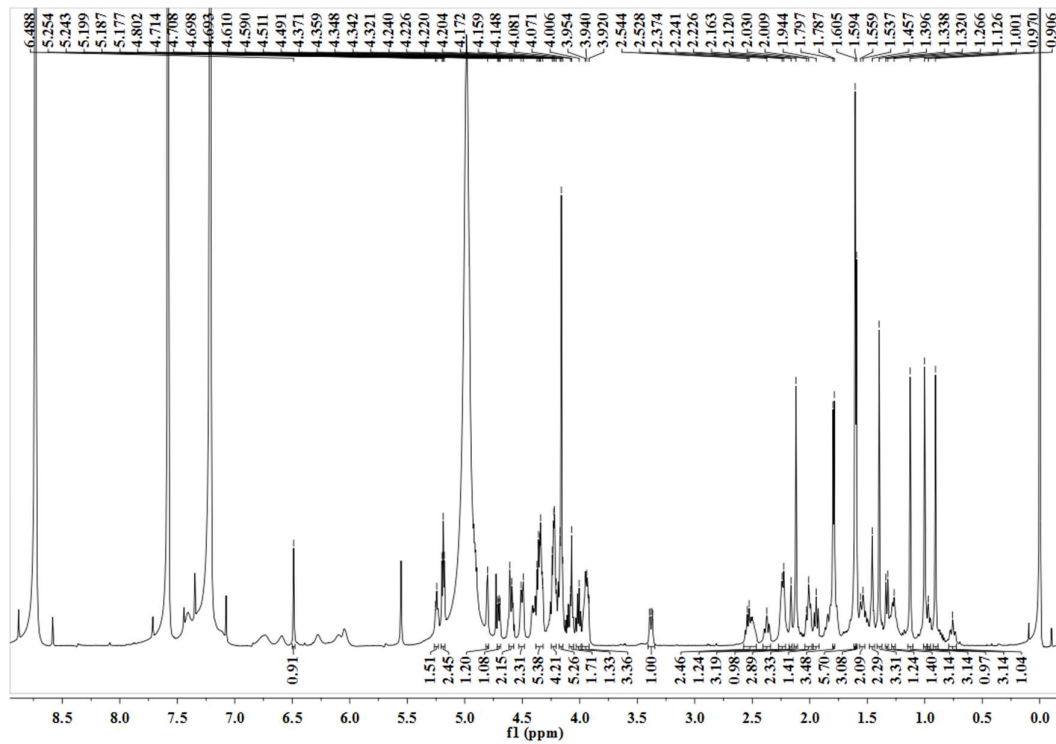

**B**

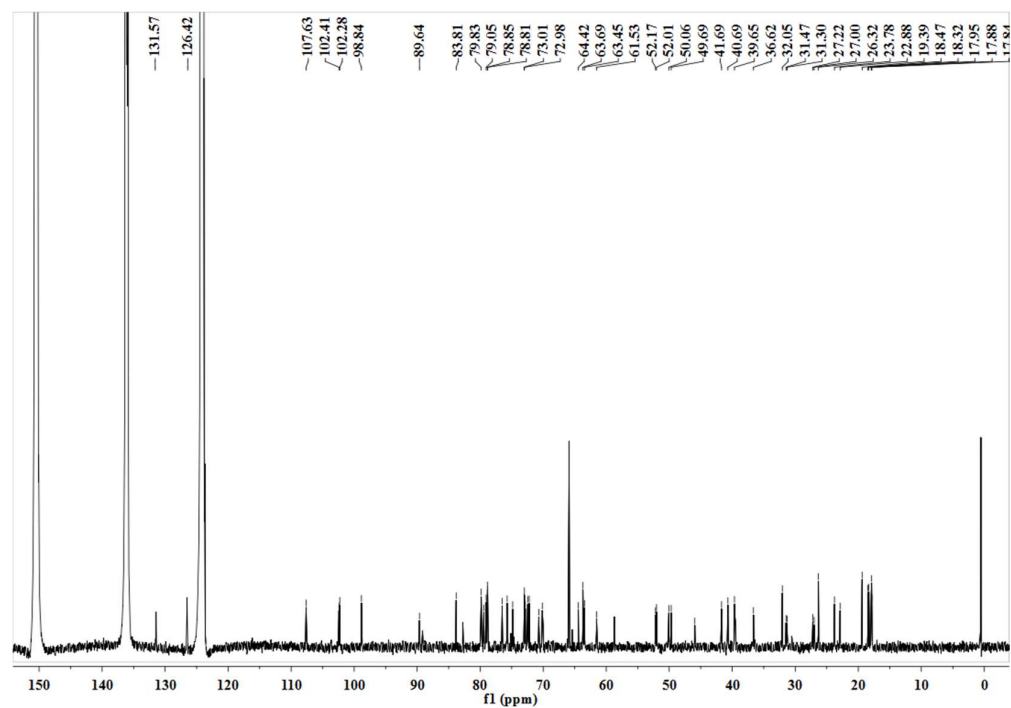

C

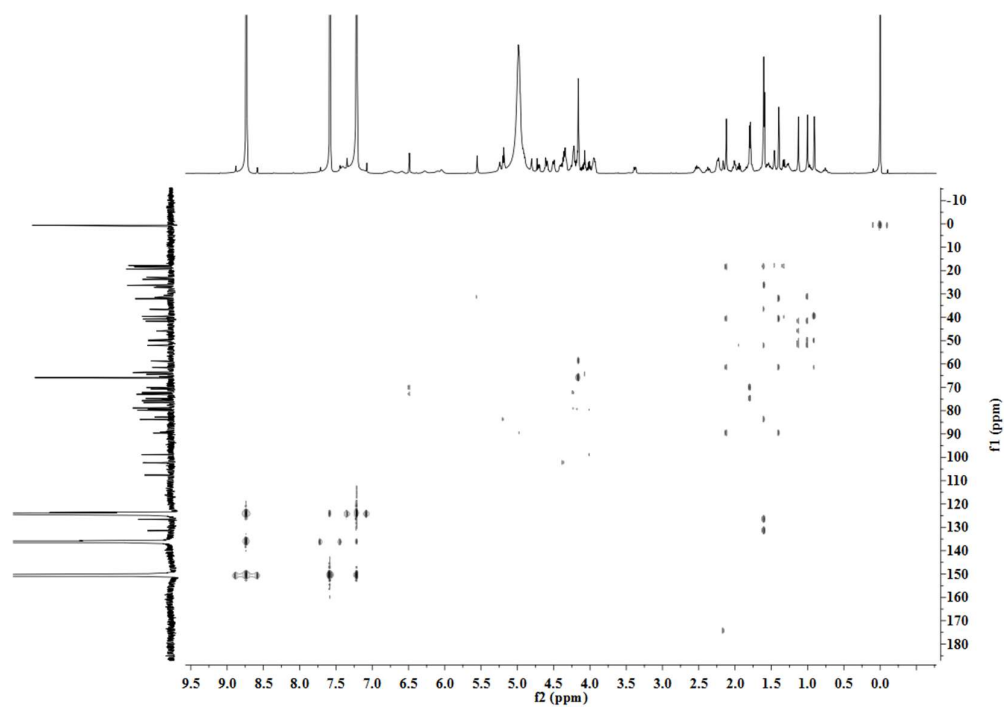

D

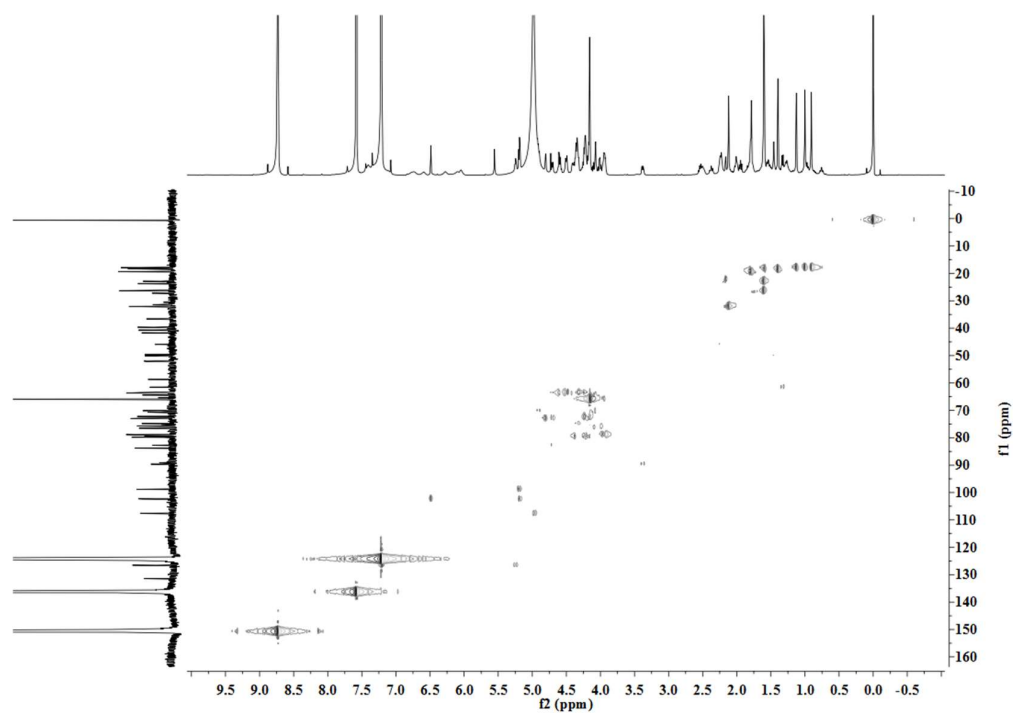

**Figure S2.** The  $^1\text{H}$  NMR (A),  $^{13}\text{C}$  NMR (B), HMBC (C) and HSQC (D) spectra of product **2** in pyridine- $d_5$ .

A

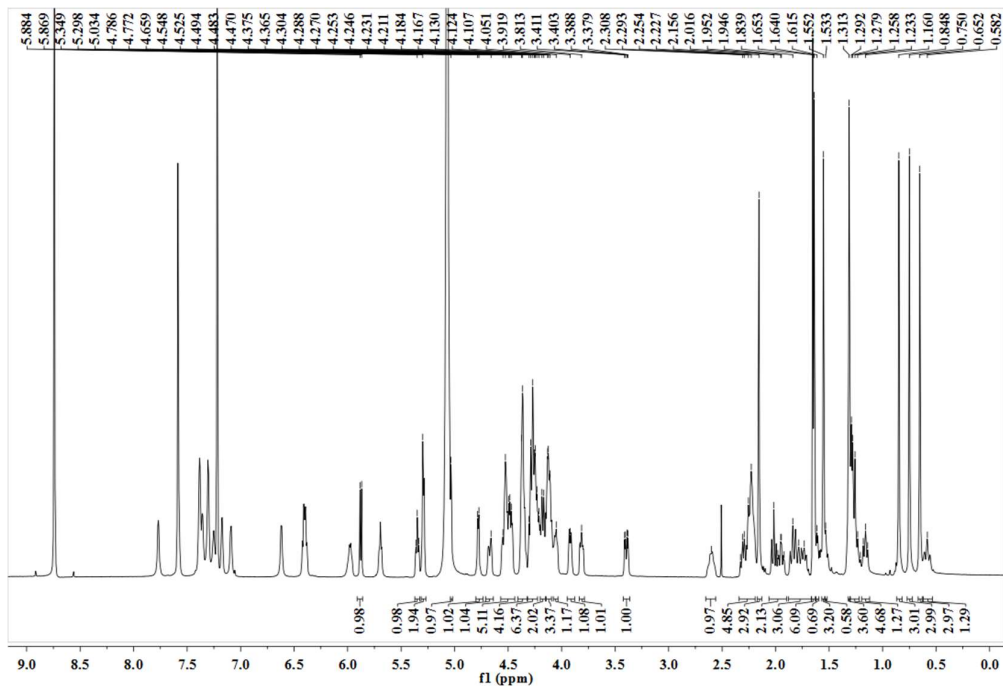

B

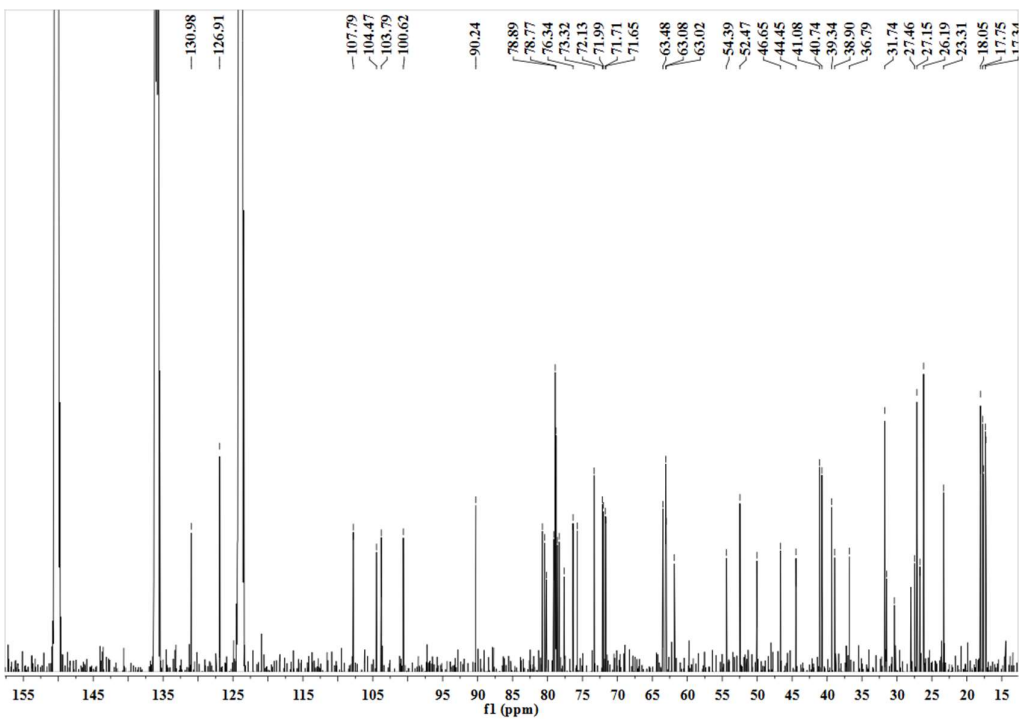



C

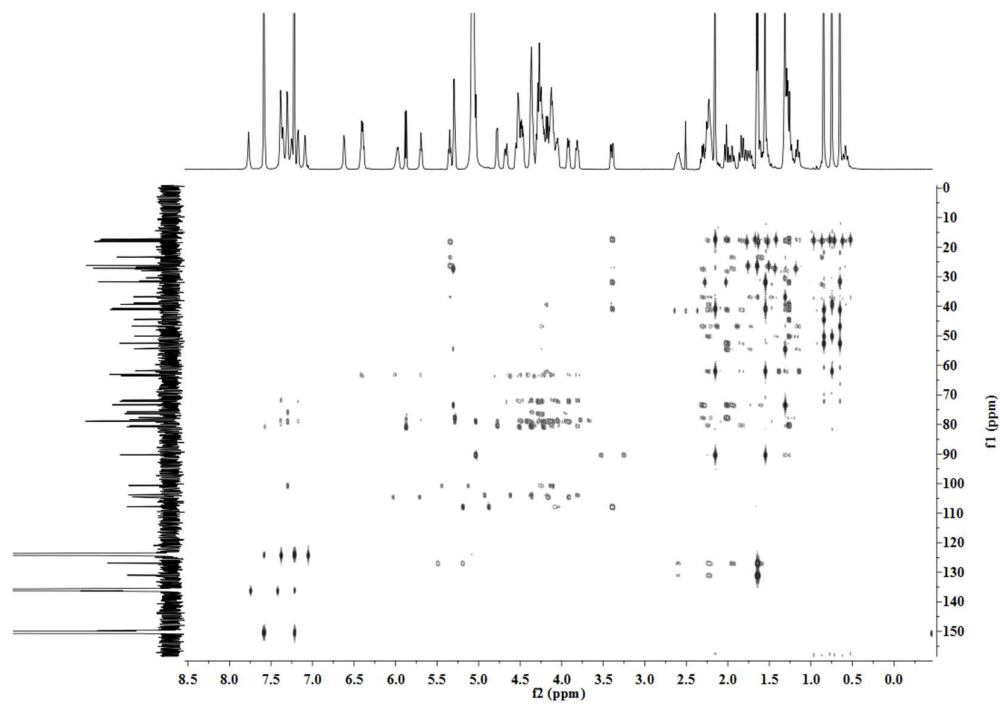

D

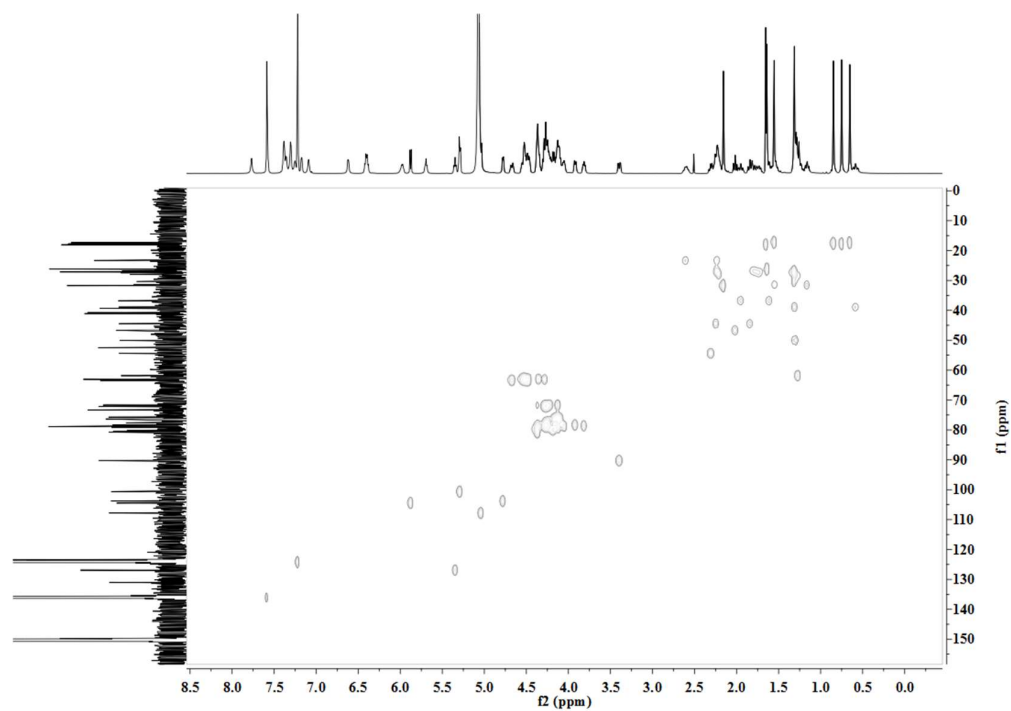

**Figure S3.** The  $^1\text{H}$  NMR (A),  $^{13}\text{C}$  NMR (B), HMBC (C) and HSQC (D) spectra of product **3** in pyridine- $d_5$ .

**A**

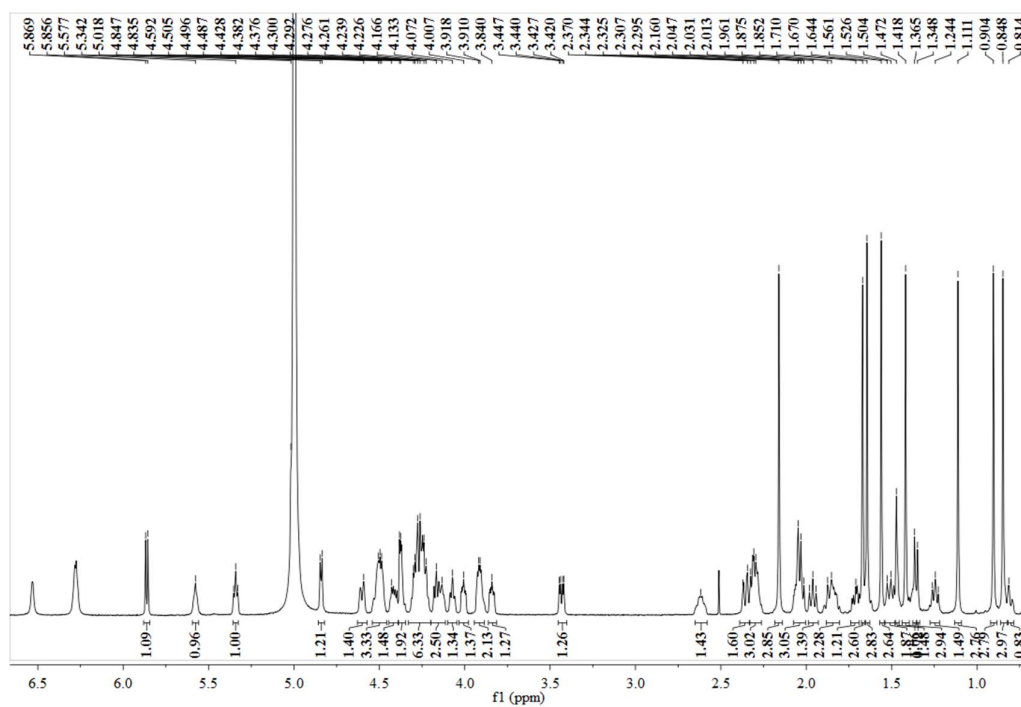

**B**

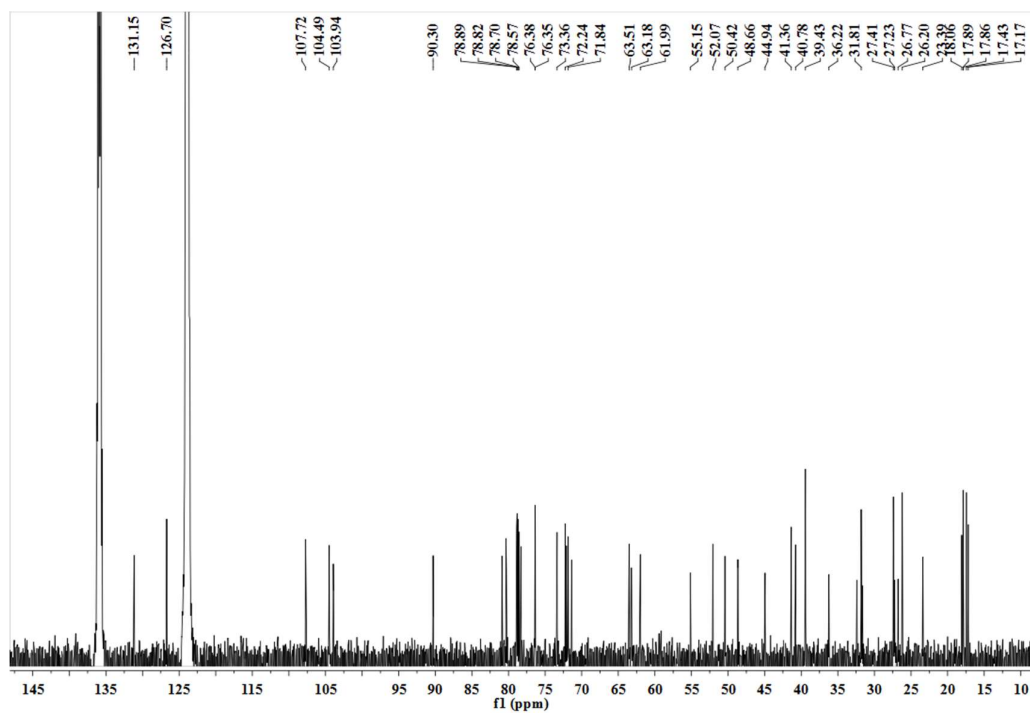

C

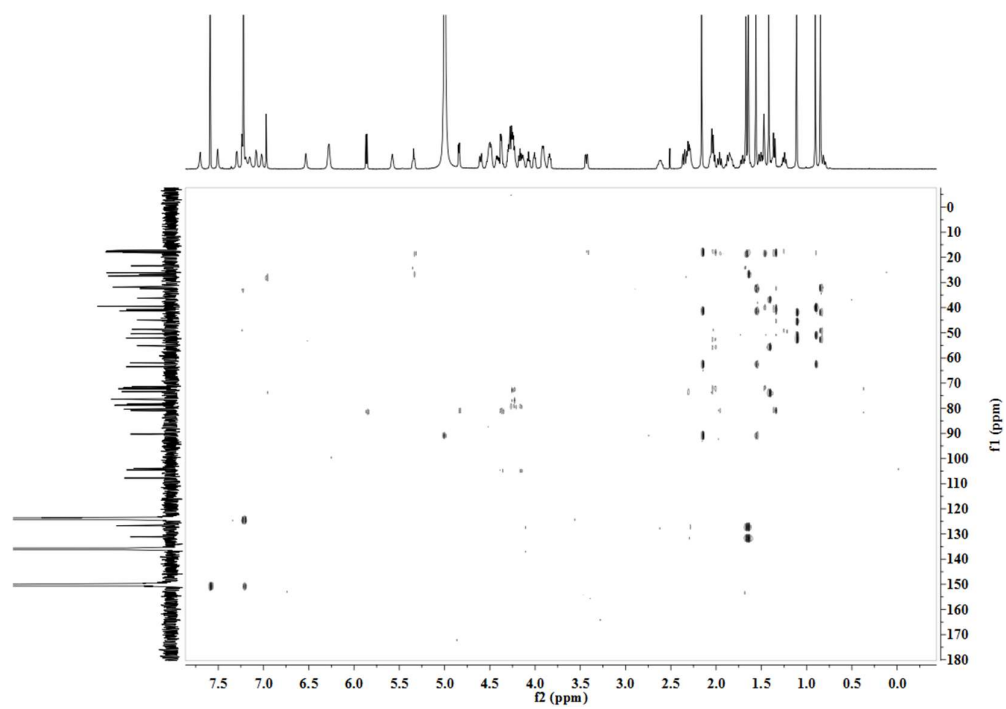

D

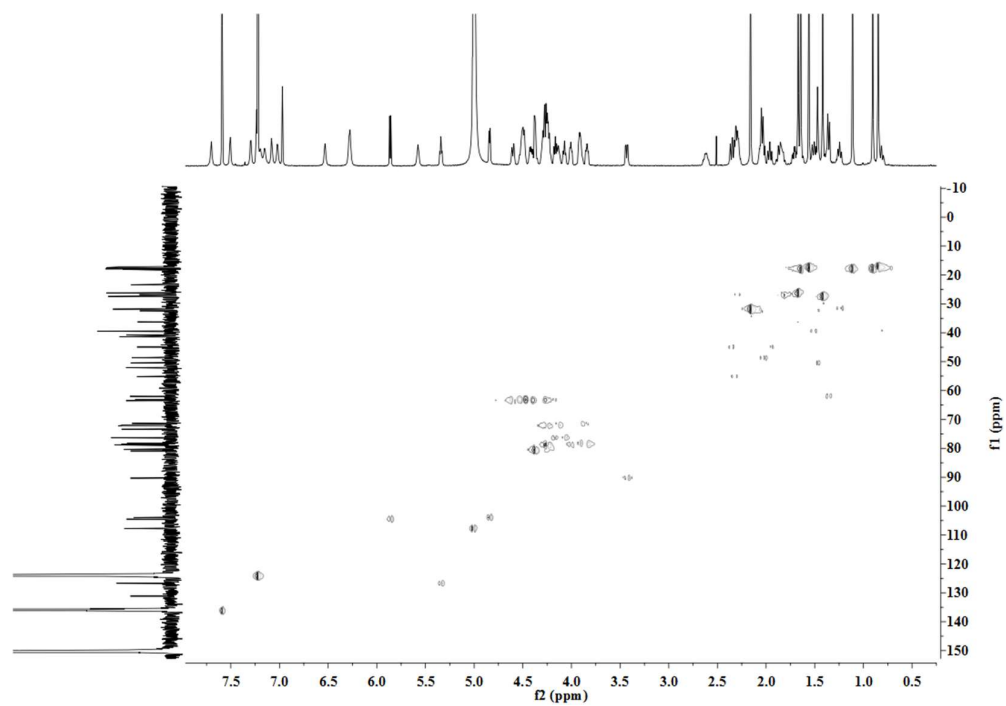

**Figure S4.** The  $^1\text{H}$  NMR (A),  $^{13}\text{C}$  NMR (B), HMBC (C) and HSQC (D) spectra of product **4** in methanol- $d_4$ .

**A**

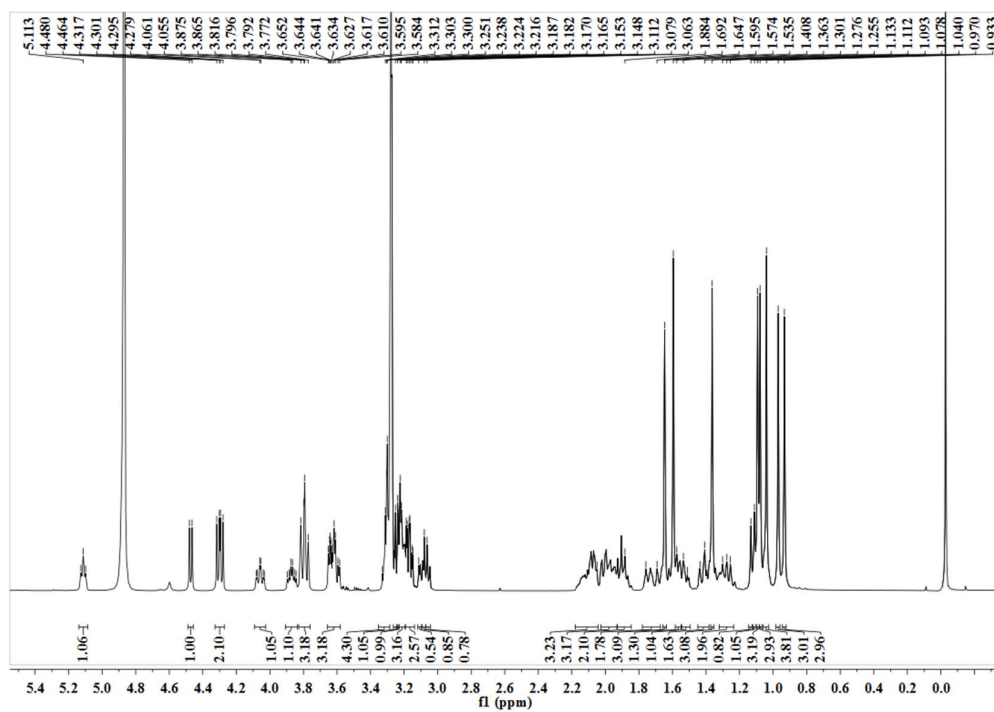

**B**

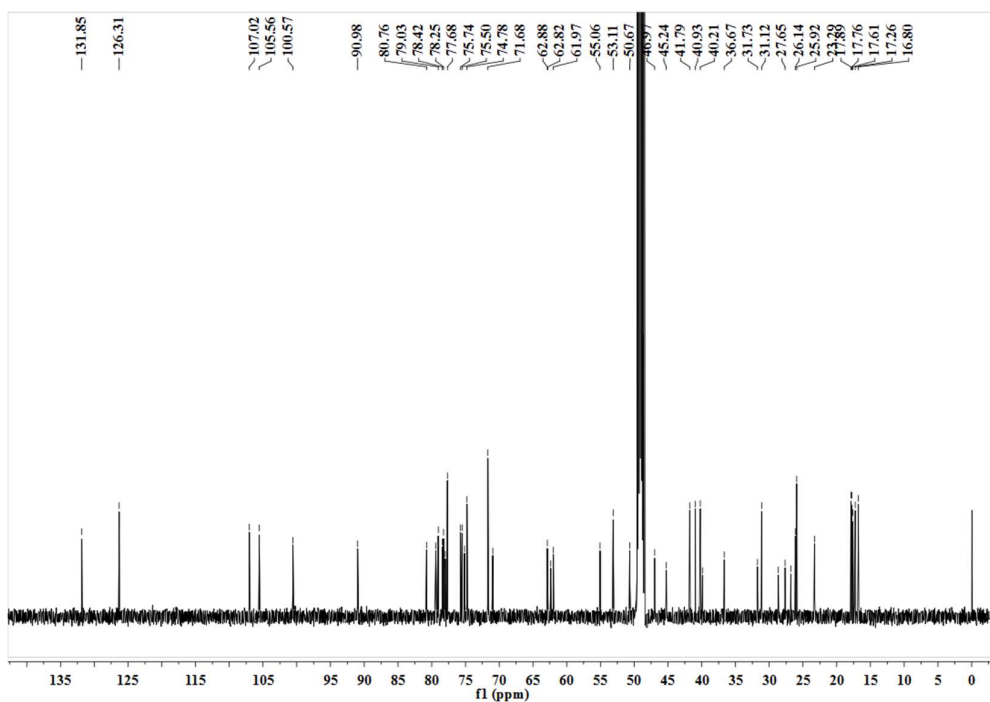

C

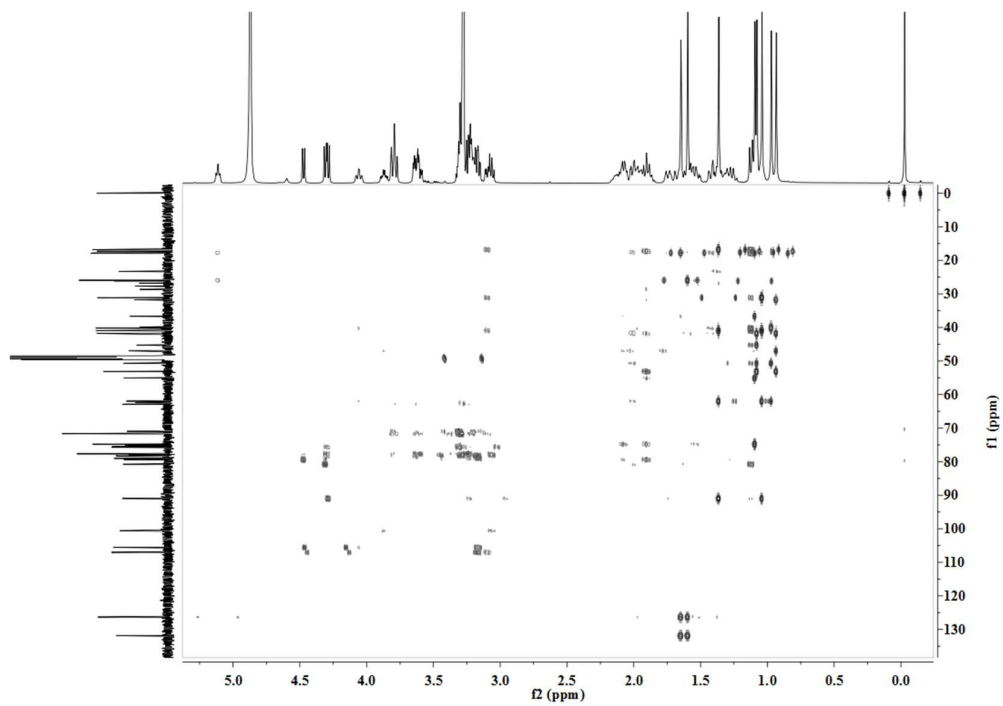

D

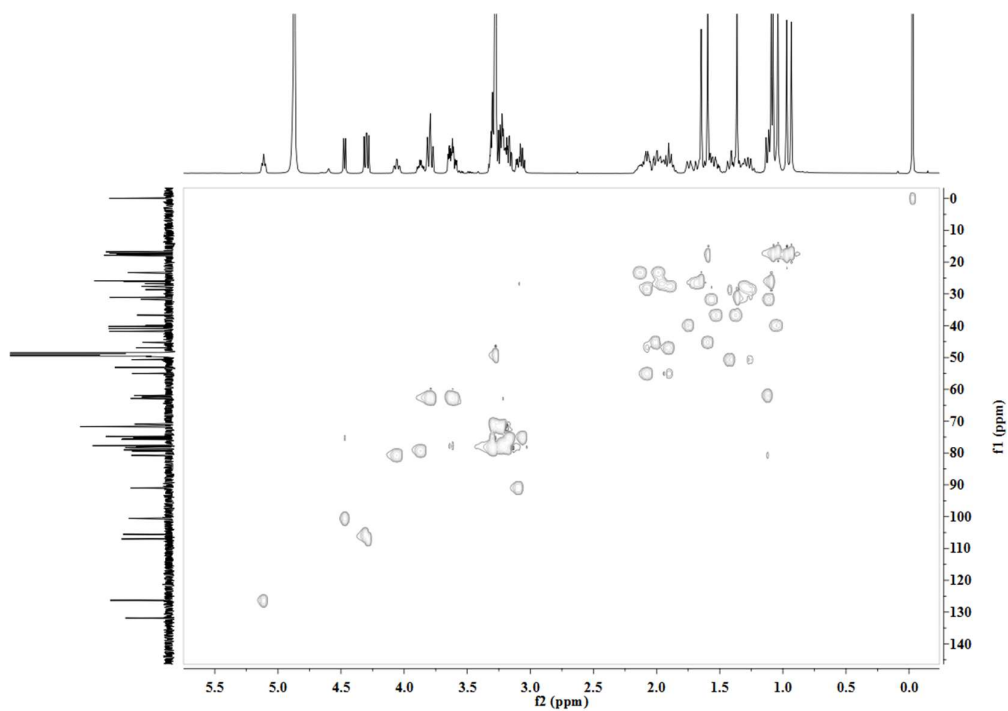

**Figure S5.** The  $^1\text{H}$  NMR (A) and  $^{13}\text{C}$  NMR (B) spectra of product **5** in methanol- $d_4$ .

A

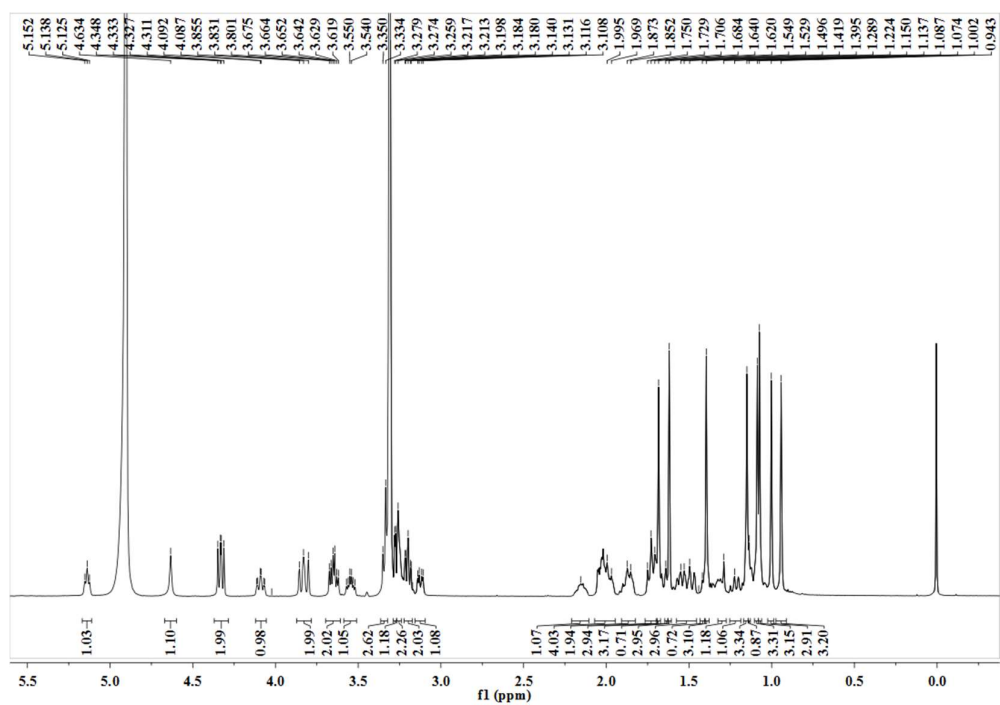

B

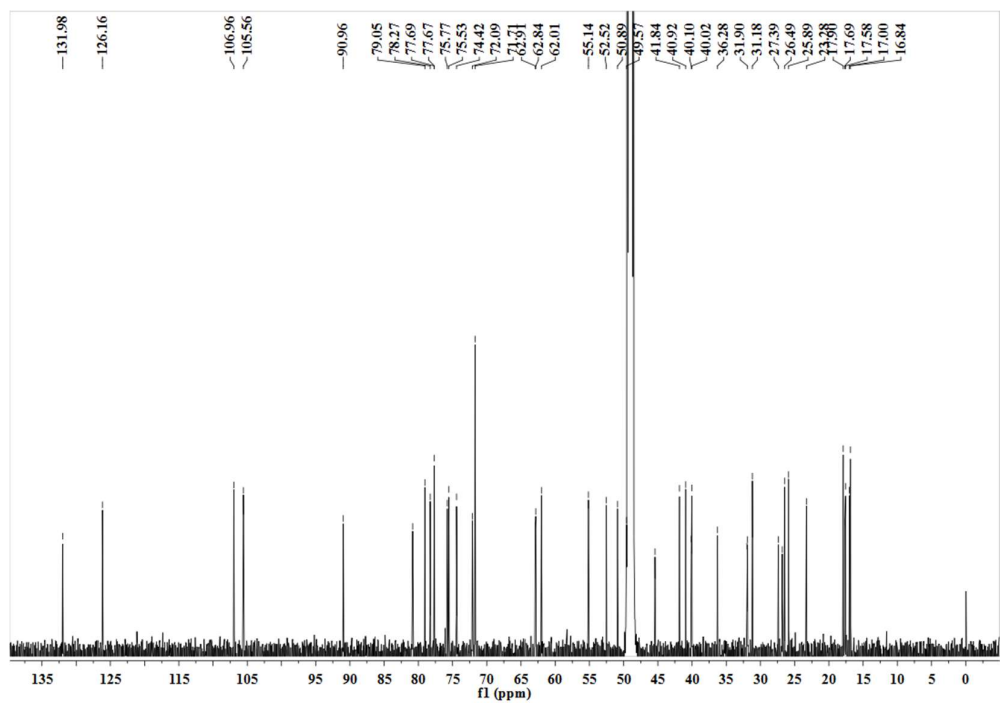

**Figure S6.** The  $^1\text{H}$  NMR (A),  $^{13}\text{C}$  NMR (B), HMBC (C) and HSQC (D) spectra of product **6** in pyridine- $d_5$ .

**A**

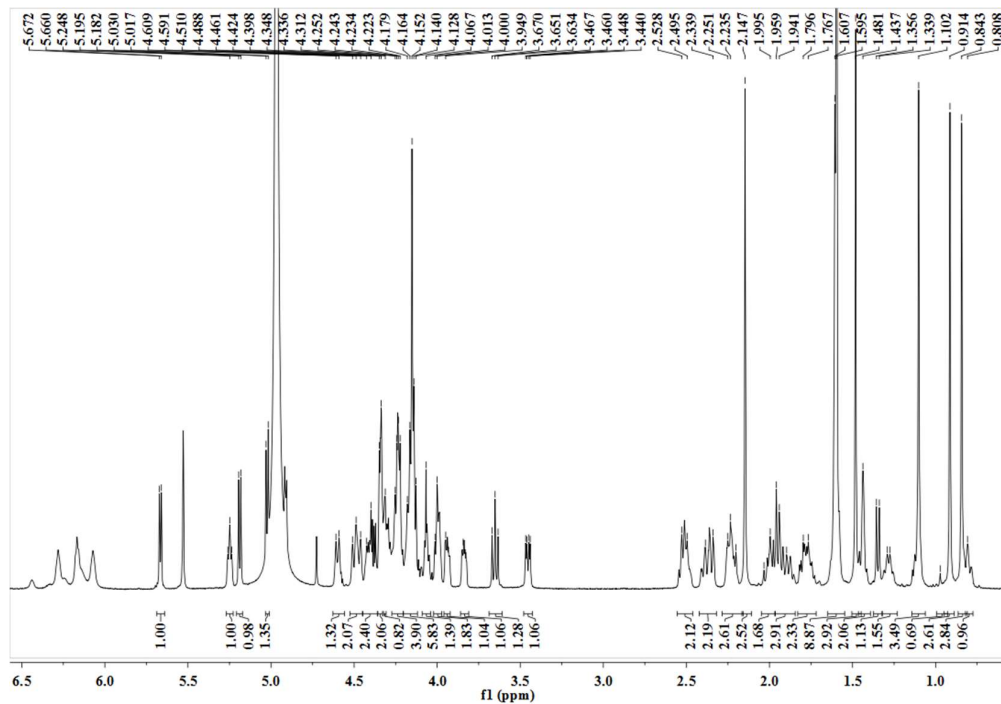

**B**

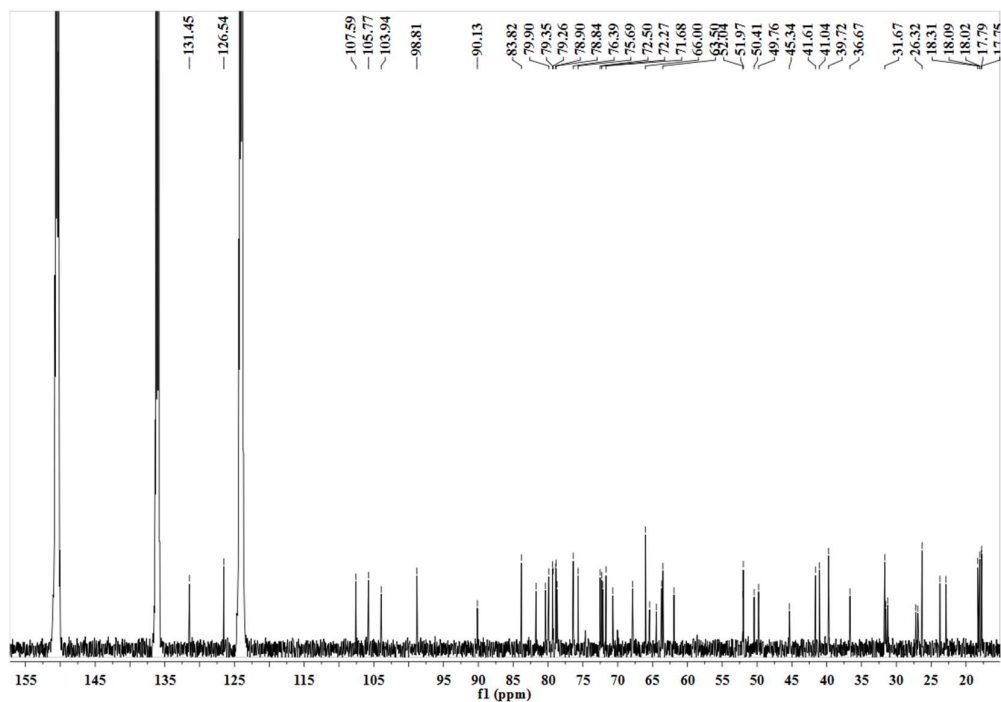

C

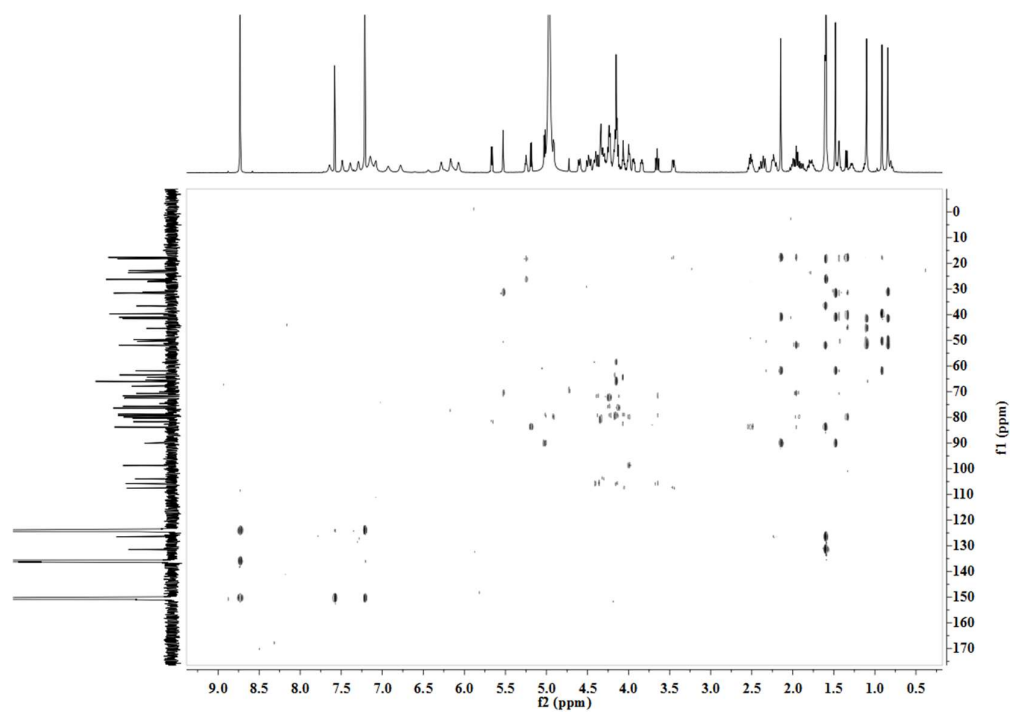

D

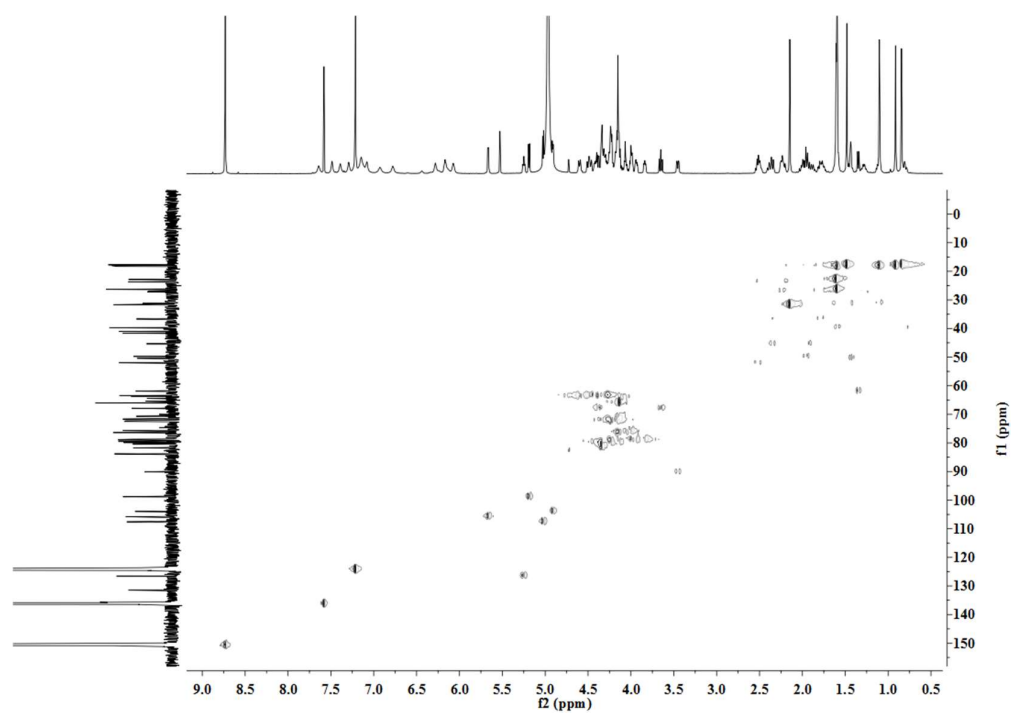

Supplement: molecules-23-02797-s001.pdf [file molecules-23-02797-s001.pdf]
